# Supplementary material for: Molecular Taphonomy of Heme: Chemical Degradation of Hemin under Presumed Fossilization Conditions
Source: Preprints.org preprint supplement (doi:10.20944/preprints202305.2225.v1), 2023-05-31
Supplement: Supplementary file 1 [file supplementary]

**Molecular taphonomy of heme: Chemical degradation of hemin under presumed fossilization conditions**

**Mariam Tahoun <sup>1</sup>, Marianne Engeser <sup>2\*</sup>, Luca Svolacchia <sup>1</sup>, Paul Martin Sander <sup>3</sup> and Christa E. Müller <sup>1, \*</sup>**

<sup>1</sup> PharmaCenter Bonn & Pharmaceutical Institute, Department of Pharmaceutical and Medicinal Chemistry, University of Bonn, An der Immenburg 4, D-53121 Bonn, Germany; [mtahoun@uni-bonn.de](mailto:mtahoun@uni-bonn.de); [s6lusvol@uni-bonn.de](mailto:s6lusvol@uni-bonn.de); [christa.mueller@uni-bonn.de](mailto:christa.mueller@uni-bonn.de)

<sup>2</sup> Kekulé Institute for Organic Chemistry and Biochemistry, University of Bonn, D-53121 Bonn, Germany; [marianne.engeser@uni-bonn.de](mailto:marianne.engeser@uni-bonn.de)

<sup>3</sup> Institute of Geosciences, Department of Paleontology, University of Bonn, D-53113 Bonn, Germany; [paulmartinsander@gmail.com](mailto:paulmartinsander@gmail.com)

\* Correspondence: [christa.mueller@uni-bonn.de](mailto:christa.mueller@uni-bonn.de); [marianne.engeser@uni-bonn.de](mailto:marianne.engeser@uni-bonn.de)

**Table of Contents**

|                                                                                        |   |
|----------------------------------------------------------------------------------------|---|
| I. <sup>1</sup> H-NMR and <sup>13</sup> C-NMR spectra of isolated hematinic acid ..... | 2 |
| II. High-resolution mass spectra of isolated hematinic acid .....                      | 3 |

I.  $^1\text{H}$ -NMR and  $^{13}\text{C}$ -NMR spectra of isolated hematinic acid

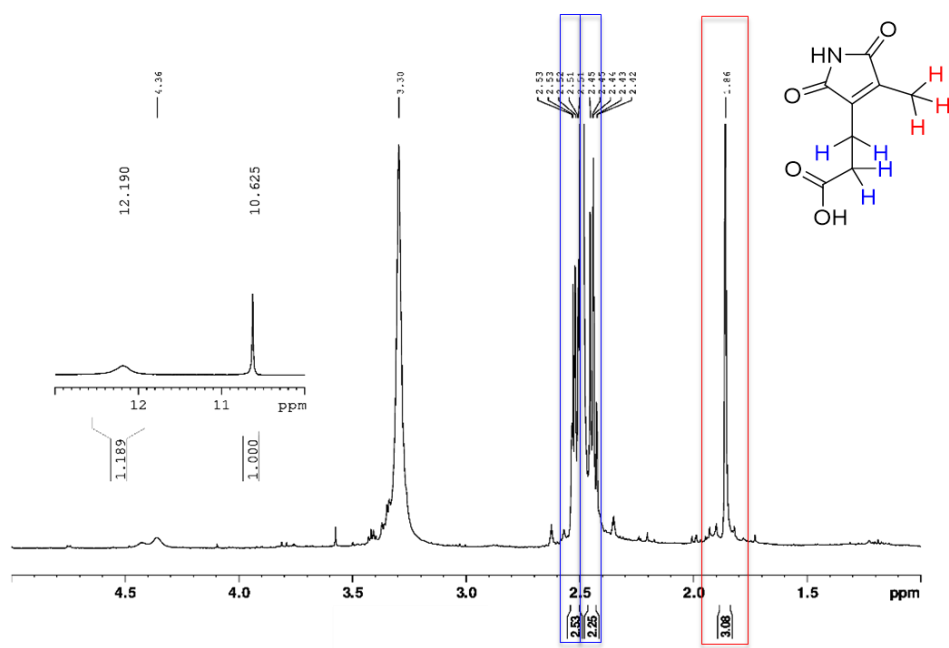

**Figure S1.**  $^1\text{H}$  NMR spectrum of isolated hematinic acid determined in  $\text{DMSO}-d_6$ .

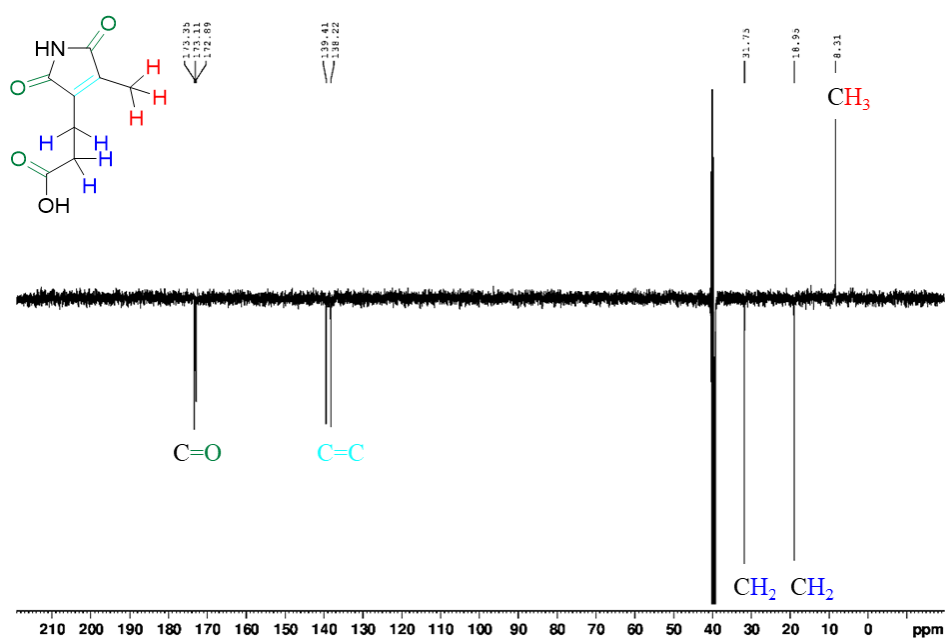

**Figure S2.**  $^{13}\text{C}$  NMR spectrum (attached proton test, APT) of isolated hematinic acid determined in  $\text{DMSO}-d_6$ .

## II. High-resolution mass spectra of isolated hematinic acid

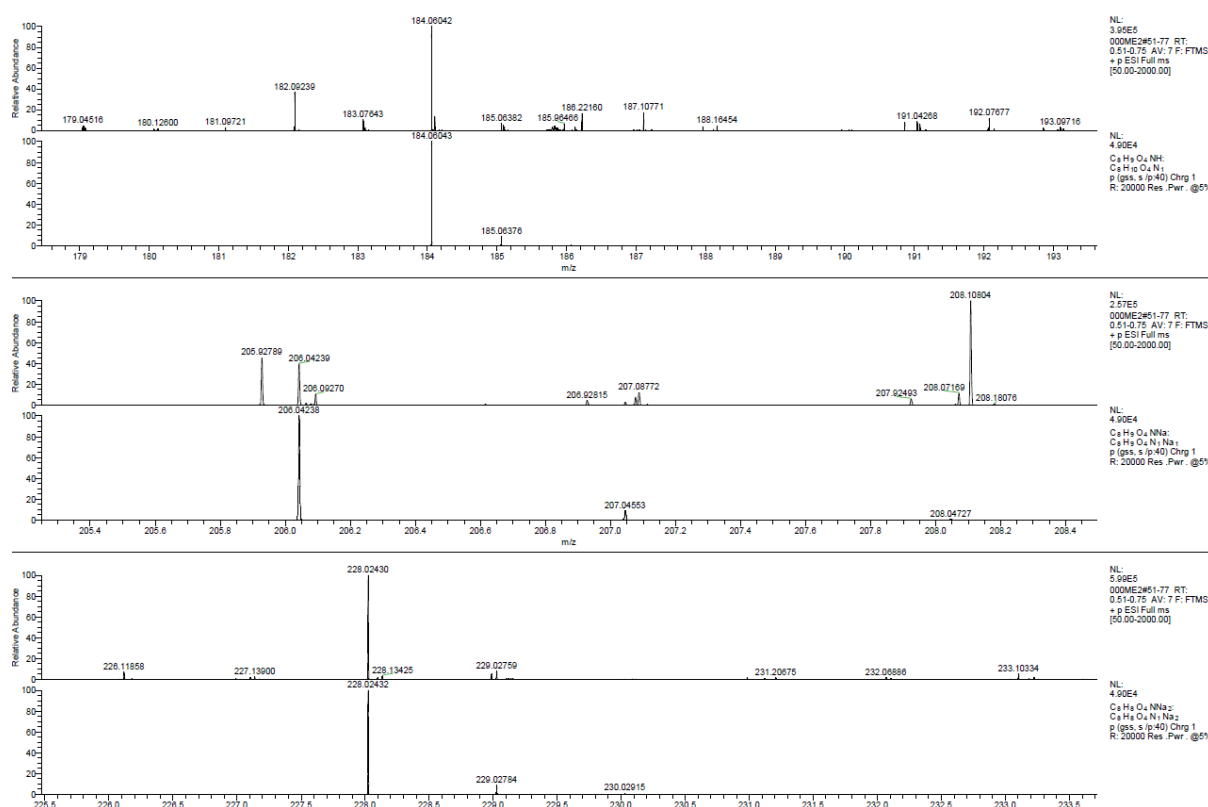

**Figure S3.** High resolution direct infusion electrospray mass spectra (Orbitrap XL) of isolated hematinic acid showing its molecular ions  $[M+H]^+$  at  $m/z$  184.06043 (top),  $[M+Na]^+$  at  $m/z$  206.04239 (top), and  $[M+2Na-H]^+$  at  $m/z$  228.02430 (bottom). In each case, the measured spectrum is shown above, the calculated one below for comparison.

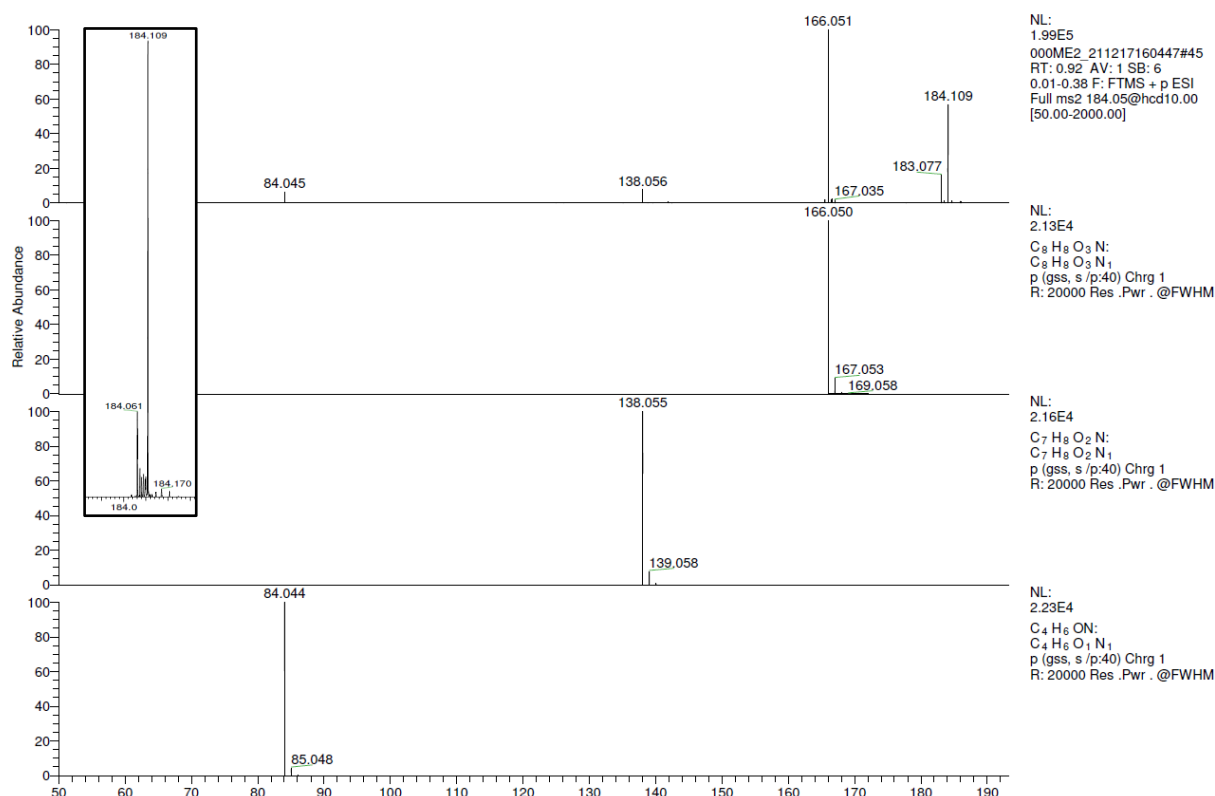

**Figure S4.** Collision-induced dissociation (CID) high resolution mass spectrum of mass-selected protonated hematinic acid showing its fragmentation pattern starting with consecutive losses of  $\text{H}_2\text{O}$  and  $\text{CO}$ , calculated spectra for the fragments below for comparison. The inset on the top left shows a zoom into the mass-selected region in the measured CID spectrum. Two signals with  $m/z$  184 were present in the original spectrum (see Figure S3 top row), most of the molecular ion of hematinic acid ( $m/z$  184.061) was fragmented by CID.
